# Supplementary material for: A non-adiabatic quantum-classical dynamics study of the intramolecular excited state hydrogen transfer in ortho-nitrobenzaldehyde
Source: Royal Society of Chemistry journal article supplement (doi:10.1039/c1cp20620f), 2011-01-01
Supplement: c1cp20620f.pdf [file c1cp20620f.pdf]

## SUPPLEMENTARY MATERIAL

### **A non-adiabatic quantum-classical dynamics study of the intramolecular excited state hydrogen transfer in *ortho*- Nitrobenzaldehyde**

**Veronica Leyva<sup>1</sup>, Inés Corral<sup>1#</sup>, Ferran Feixas<sup>2</sup>, Annapaola Migani,<sup>2</sup> Lluís Blancafort<sup>2</sup>, Jesús González-Vázquez<sup>1\$</sup>, Leticia González<sup>1,3\*</sup>**

<sup>1</sup>Institut für Physikalische Chemie, Friedrich Schiller Universität Jena, Helmholtzweg 4, 07743 Jena, Germany.

<sup>2</sup>Institute of Computational Chemistry and Department of Chemistry, University of Girona, Campus de Montilivi, 17071 Girona, Spain.

<sup>3</sup>Abbe Center of Photonics, Friedrich Schiller University Jena, Germany.

<sup>#</sup>Present address: Departamento de Química. Módulo 13. Facultad de Ciencias. Universidad Autónoma de Madrid, Spain.

<sup>\$</sup>Present address: Instituto de Química Física Rocasolano, CSIC, C/ Serrano 119, 28006 Madrid, Spain.

\*Corresponding author: [leticia.gonzalez@uni-jena.de](mailto:leticia.gonzalez@uni-jena.de)

### Trajectories launched from the FC equilibrium structure.

Here, we describe the results from the trajectories started from the FC structure. The electronic deactivation of *o*-NBA was also studied assuming an instantaneous excitation ( $\delta$ -pulse) from the equilibrium minimum in the  $S_0$  to the  $S_1$  state, i.e. the trajectories generated at the ground state minima are integrated starting in the  $S_1$  potential. Figure S1 shows the  $O_9-H_8$  and  $C_6-H_8$  distances involved in the ESIHT of *o*-NBA at the final time of the simulation, crosses and circles symbolize trajectories ending up in the  $S_1$  and  $S_0$  electronic states, respectively. From the 179 initial conditions of the Wigner distribution centered at the ground state geometry, only two trajectories are able to overcome the barrier, go through the CI, and end in the electronic ground state; these trajectories show a long  $C_6-H_8$  distance and a short  $O_9-H_8$  one at the end of the propagation, indicating that the HT is complete. This shows that the HT takes place together with the decay to the ground state, in agreement with the mechanism of Figure 1. The rest of the trajectories clearly remain localized in the  $S_1$  state with a  $C_6-H_8$  bond of ca. 1.1 Å, as in the equilibrium geometry in the  $S_0$ . In this set of localized trajectories, the  $O_9-H_8$  distances range from 2 to 3 Å, as a consequence of a strong vibration in the excited state around the equilibrium distance of ca. 2.3 Å. Clearly, the maximum  $C_6-H_8$  distance obtained in most of the cases (ca. 1.3 Å) is not enough to reach the TS, and therefore the system is trapped in the  $(n\pi^*)_{Min}$ .

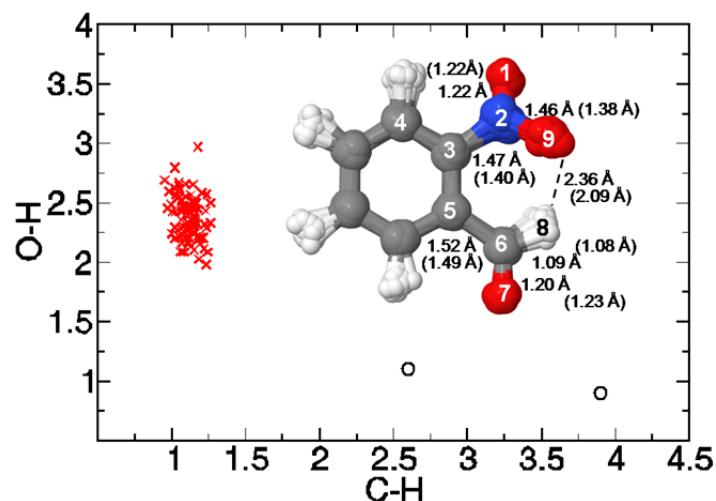

**Figure S1.**  $O_9-H_8$  and  $C_6-H_8$  bond distances at the final time of the simulation for the set of trajectories propagated from the *o*-NBA equilibrium geometry (FC). The crosses and circles indicate trajectories ending in the  $S_1$  and  $S_0$ , respectively. The inset shows a superposition of the corresponding geometries at the end of the propagation, indicating the average bond distances (values in parenthesis correspond to the structure optimized at CASSCF(14,12) level of theory).

The inset of Fig. S1 displays a superposition of all geometries corresponding to each of the trajectories in the  $S_1$  state at the end of the propagation. In parenthesis, we report the values of the structure optimized at CASSCF(14,12) level of theory. The averaged geometry corresponds to the system confined in  $(n\pi^*)_{\text{Min}}$ , with approximately 0.2 Å elongated  $N_2-O_9$  distances as a consequence of populating the antibonding  $\pi_{\text{NO}_2^*}$  orbital. Moreover, the nitro and aldehyde groups, which lie in planes forming 30° dihedral angles with respect to benzene in the ground state, planarize by approximately 10 and 20° in the  $(n\pi^*)_{\text{Min}}$ , respectively.
